# Supplementary material
Source: publisher figshare collection journal article supplement (https://tandf.figshare.com/ndownloader/files/17797103)
Supplement: Supplementary file 1 [file 17797103]

**Responses of PYR/PYL/RCAR ABA Receptors to Contrasting stresses, Heat and Cold in Arabidopsis**

Qian Zhang, Xiangge Kong, Qin Yu, Yongqiang Ding, Xiaoyi Li, Yi Yang*

Key Laboratory of Bio-Resources and Eco-Environment of Ministry of Education, State Key Laboratory of Hydraulics and Mountain River Engineering, College of Life Sciences, Sichuan University, Chengdu, 610065, China

* Correspondence: [yangyi528@scu.edu.cn](mailto:yangyi528@scu.edu.cn)

**Figure S1 Quantitative RT-PCR of *RCAR12/13* responses to heat stress**

One-week-old WT plants were exposed to heat shock at 38 °C, 42 °C or 52 °C for 2 h or control without heat stress. And then total RNA was isolated. *ACTIN2/8* was used as an internal control. Each value is the means ± SD of the three independent biological experiments.

**Figure S2 Quantitative RT-PCR of *RCAR12/13* responses to cold acclimation.**

One-week-old WT plants were exposed to cold stress at 4 °C for 12 h, -20 °C for 60 min, and then transferred to the normal condition for 3 h. *RCARs* of relative expression levels were isolated by quantitative RT-PCR. *ACTIN2/8* was used as an internal control. Each value is the means ± SD of the three independent biological experiments.

**Table S1 Primers used in this paper**

Figure S1

Figure S2

Table S1

| qRT-PCR analysis | *CBF1*-F | AAGTACAAGACGAAGGATAGCATGAG |
| --- | --- | --- |
| *CBF1*-R | ATCGTCTCCTCCATGTCCAG |
| *CBF2-F* | TGACGTGTCCTTATGGAGCTA |
| *CBF2-R* | CTGCACTCAAAAACATTTGCA |
| *CBF3-F* | GATGACGACGTATCGTTATGGA |
| *HSP70*-F | CATGACCGCGTCGAAATCATCG |
| *HSP70*-R | GCCAGTGACTCTTATCCGCTTGAAC |
| *HSP18.2*-F | CCGTTCTCGCAAGACTTATGG |
| *HSP18.2*-R | GAAGCGTTTGCCAACGCAGAA |
| *ACTIN2/8*-F | GGTAACATTGTGCTCAGTGGTGG |
| *ACTIN2/8*-R | AACGACCTTAATCTTCATGCTGC |
